# Supplementary material for: Mortality prediction of serum neutrophil gelatinase-associated lipocalin in patients requiring continuous renal replacement therapy
Source: PubMed Central journal article supplement — Korean J Intern Med. 2020 Jul 7;36(2):392–400. doi: 10.3904/kjim.2019.446 (PMC7969065; doi:10.3904/kjim.2019.446), 2020-07-07
Supplement: kjim-2019-446-suppl1.pdf [file kjim-2019-446-suppl1.pdf]

**Supplementary Table 1. Baseline characteristics and clinical features of survivor and non-survivor group in the low APACHE-II score group (< 27.5)**

| Characteristic                     | Survivor (n = 39)   | Non-survivor (n = 36) | p value |
|------------------------------------|---------------------|-----------------------|---------|
| Serum NGAL, ng/mL                  | 383.0 (215.0–713.0) | 716.0 (397.5–1,239.8) | 0.003   |
| APACHE-II score                    | 22.0 (16.0–24.0)    | 24.0 (22.0–26.0)      | 0.012   |
| SOFA score                         | 10.0 (8.0–12.0)     | 11.0 (10.0–13.0)      | 0.032   |
| Serum NGAL $\geq$ 511.5 ng/mL      | 13 (33.3)           | 23 (63.9)             | 0.008   |
| APACHE-II score $\geq$ 23.5        | 13 (33.3)           | 21 (58.3)             | 0.030   |
| SOFA score $\geq$ 10.5             | 19 (48.7)           | 23 (63.9)             | 0.186   |
| Age, yr                            | 57.1 $\pm$ 17.1     | 64.8 $\pm$ 15.9       | 0.047   |
| Body mass index, kg/m <sup>2</sup> | 23.6 $\pm$ 3.9      | 22.3 $\pm$ 3.6        | 0.168   |
| Male sex                           | 24 (61.5)           | 19 (52.8)             | 0.443   |
| C-reactive protein, mg/dL          | 9.5 (2.7–18.4)      | 13.5 (8.1–18.5)       | 0.360   |
| Mechanical ventilation             | 15 (38.5)           | 20 (55.6)             | 0.138   |
| Inotropics administration          | 18 (46.2)           | 25 (69.4)             | 0.042   |
| Indication for CRRT initiation     |                     |                       |         |
| Sepsis                             | 13 (33.3)           | 22 (61.1)             | 0.016   |
| Postoperation                      | 7 (17.9)            | 1 (2.8)               | 0.058   |
| Cardiac                            | 4 (10.3)            | 4 (11.1)              | 1.000   |
| Pulmonary                          | 0                   | 1 (2.8)               | 0.480   |
| Hepatic                            | 8 (20.5)            | 3 (8.3)               | 0.136   |
| Renal                              | 2 (5.1)             | 2 (5.6)               | 1.000   |
| Malignancy                         | 5 (12.8)            | 3 (8.3)               | 0.713   |
| Others                             | 0                   | 0                     | -       |
| Comorbidities                      |                     |                       |         |
| Diabetes mellitus                  | 14 (35.9)           | 9 (25.0)              | 0.307   |
| Hypertension                       | 14 (35.9)           | 18 (50.0)             | 0.217   |
| Chronic kidney disease             | 6 (15.4)            | 6 (16.7)              | 0.880   |
| Cerebro-cardiovascular disease     | 12 (30.8)           | 10 (27.8)             | 0.776   |
| Pulmonary disease                  | 1 (2.6)             | 1 (2.8)               | 1.000   |
| Liver disease                      | 12 (30.8)           | 5 (13.9)              | 0.081   |
| Dementia                           | 0                   | 1 (2.8)               | 0.480   |
| Malignancy                         | 7 (17.9)            | 12 (33.3)             | 0.126   |

Values are presented as median (interquartile range), number (%), or mean  $\pm$  SD.

APACHE-II, Acute Physiology and Chronic Health Evaluation-II; NGAL, neutrophil gelatinase-associated lipocalin; SOFA, Sequential Organ Failure Assessment; CRRT, continuous renal replacement therapy.
