# Supplementary material for: Mortality prediction of serum neutrophil gelatinase-associated lipocalin in patients requiring continuous renal replacement therapy
Source: PubMed Central journal article supplement — Korean J Intern Med. 2020 Jul 7;36(2):392–400. doi: 10.3904/kjim.2019.446 (PMC7969065; doi:10.3904/kjim.2019.446), 2020-07-07
Supplement: kjim-2019-446-suppl4.pdf [file kjim-2019-446-suppl4.pdf]

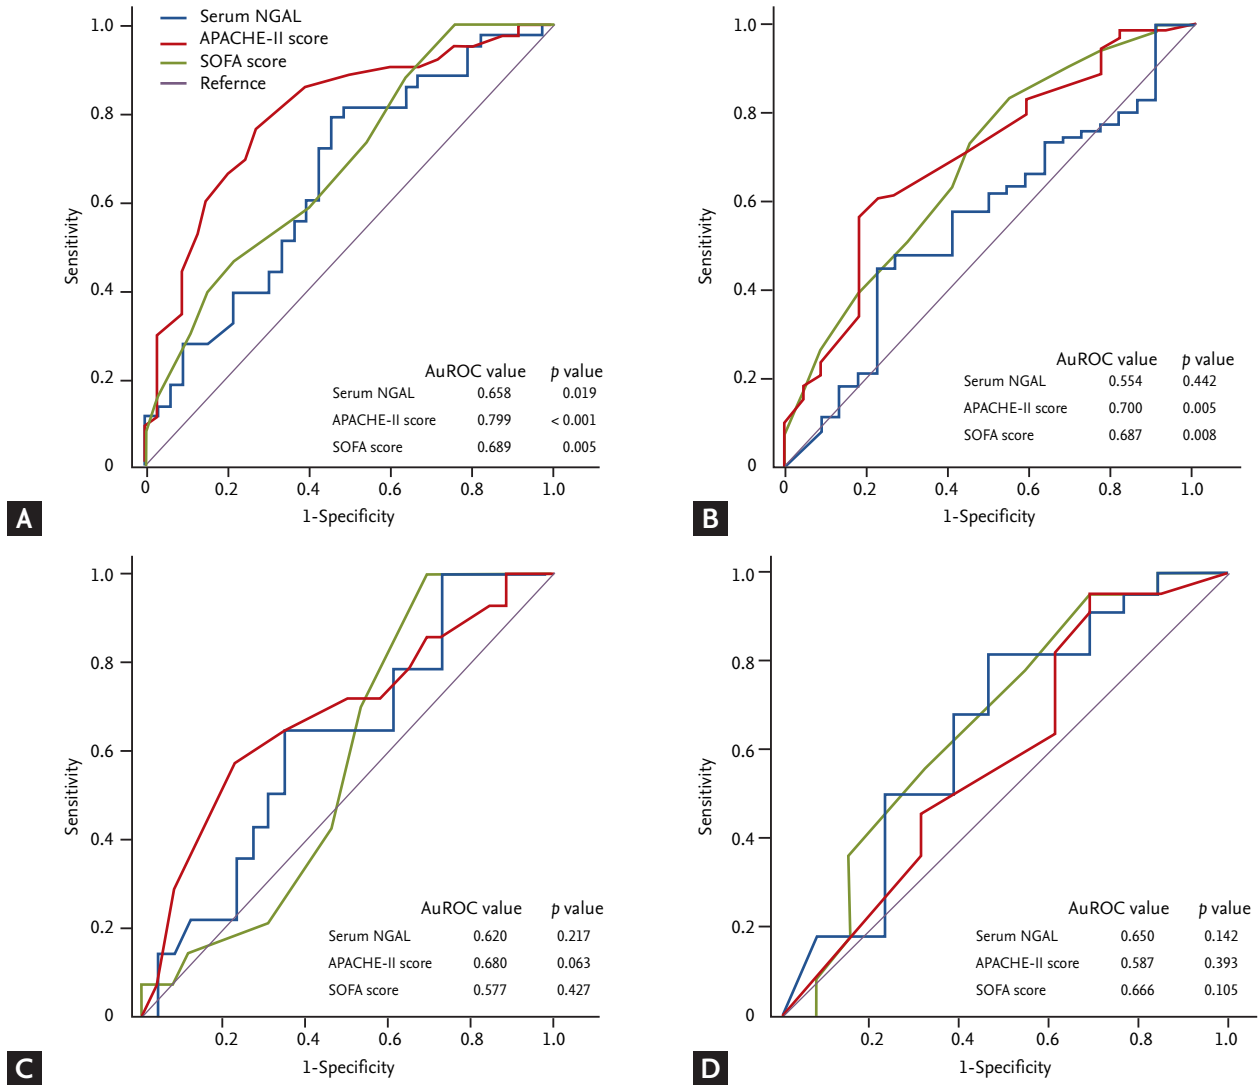

**Supplementary Figure 1.** Predictive value for 28-day mortality of serum neutrophil gelatinase-associated lipocalin (NGAL) level, Acute Physiology and Chronic Health Evaluation-II (APACHE-II) score, and Sequential Organ Failure Assessment (SOFA) score in subgroup analysis according to sepsis status. (A) Non-sepsis group in overall patients, (B) sepsis group in overall patients, (C) non-sepsis group in low APACHE-II score, and (D) sepsis group in low APACHE-II score.
